# Supplementary material for: Anti-Trypanosoma cruzi antibody profiling in patients with Chagas disease treated with benznidazole assessed by genome phage display
Source: PubMed Central journal article supplement (PMC9851536; doi:10.1371/journal.pntd.0011019), 2023-01-06
Supplement: pntd.0011019.s006.pdf [file pntd.0011019.s006.pdf]

# ELISA

**A**

**Criterion #1**

**Criterion #2**

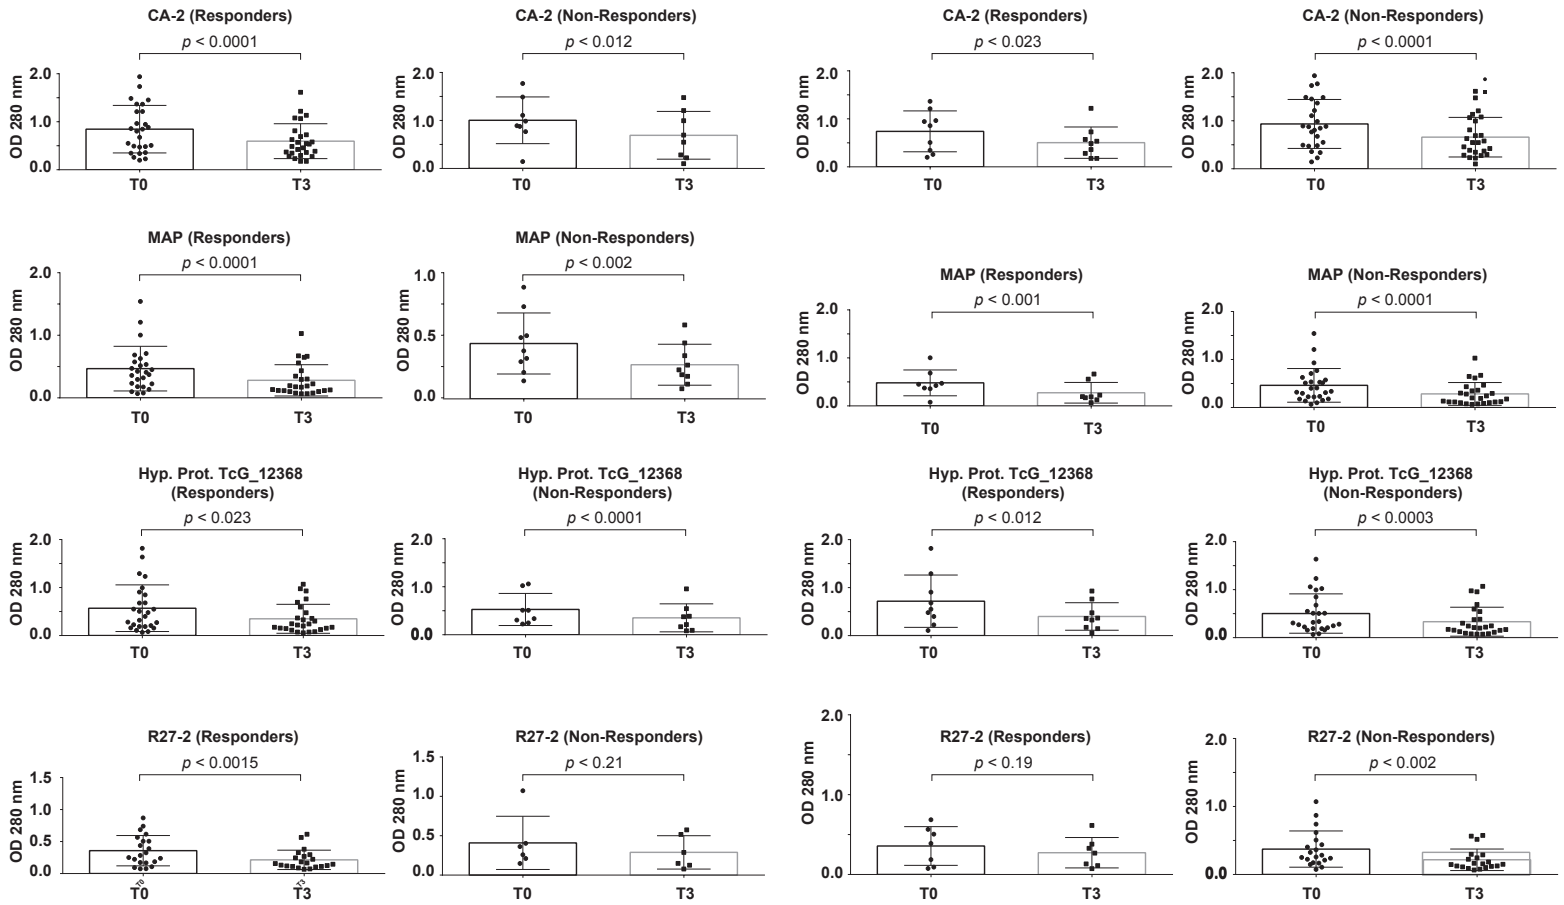

# Orthos Vitros (OV)

**B**

**Criterion #1**

**Criterion #2**

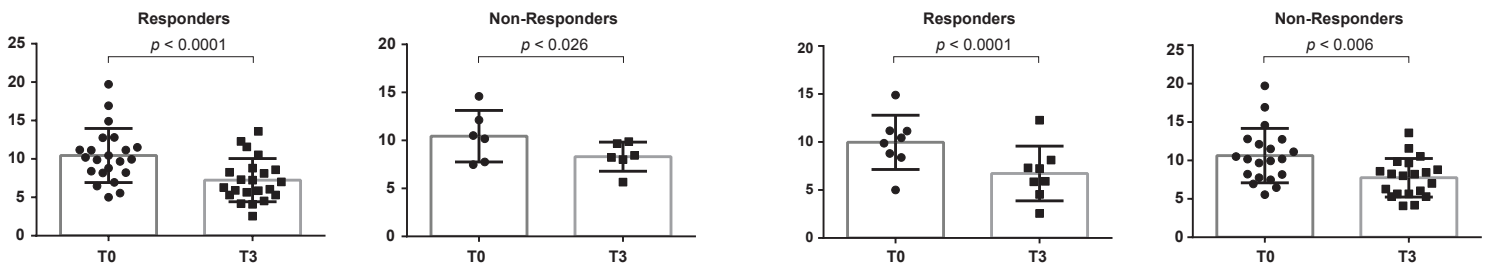

**Supplementary Figure S1. Antigen validation (individual patients) and Orthos Vitros assay. (A)** ELISA reactivity against select antigens for sera (T0 and T3) of patients classified as responders or non-responders according to each criteria. Sera from individual patients (dilution 1/200) (including 21 additional patients not used for the gPhag e selection) were tested against synthetic peptides encoding each individual antigen CA-2 (B13), Microtubule-associated protein (MAP), Hypothetical protein TcG\_12368 and R27-2 (peptide 4). Patients that showed reactivity below the cut-off value were not included. **(B)** Reactivity of sera from individual peptides using the Ortho Vitros (OV) assay. Statistical analyses: Wilcoxon paired-rank test.
